# Supplementary material for: Development of demineralized bone matrix-based implantable and biomimetic microcarrier for stem cell expansion and single-step tissue-engineered bone graft construction
Source: Royal Society of Chemistry journal article supplement (doi:10.1039/c6tb02414a), 2016-10-28
Supplement: c6tb02414a2.pdf [file c6tb02414a2.pdf]

**Development of demineralized bone matrix based implantable and biomimetic microcarrier for stem cell expansion and single-step tissue-engineered bone graft construction**

Zhenxing Wang<sup>a,b,1</sup>, Dingyu Wu<sup>a,b,1</sup>, Jiwei Zou<sup>c,1</sup>, Quan Zhou<sup>d</sup>, Wei Liu<sup>a,b</sup>, Wenjie Zhang<sup>a,b</sup>, Guangdong Zhou<sup>a,b</sup>, Xiansong Wang<sup>a,b</sup>, Guoxian Pei<sup>c,\*</sup>, Yilin Cao<sup>a,b,\*</sup>, Zhi-Yong Zhang<sup>a,b,f,\*</sup>

a Department of Plastic and Reconstructive Surgery, Shanghai 9th People's Hospital, Shanghai Key Laboratory of Tissue Engineering, School of Medicine, Shanghai Jiao Tong University, Shanghai 200011, China

b National Tissue Engineering Center of China, Shanghai 200241, China

c Department of Orthopedics, Xijing Hospital, The Fourth Military Medical University, Xi'an 710032, China

d Hunan Cancer Hospital, Hunan 410000, China

f China Orthopedic Regenerative Medicine Group (CORMed), Hangzhou, Zhejiang, 310058, China

1 These authors contributed equally to this work.

\* Corresponding authors

Corresponding authors' e-mail addresses:

\*Zhi-Yong Zhang: +86-21-34291002. Fax: +86-021-34292305

E-mail: mr.zhiyong@gmail.com

\*Yilin Cao: +86-21-34291002. Fax:+86-021-34292305 E-mail: yilincao@yahoo.com

\*Guoxian Pei: +86-29-84773524. Fax: 029-84773524 E-mail: nfperry@163.com

### **Video Legends:**

**Animation 1:** The construction of  $\mu$ TEBGs using DBM-MC and BMSCs in integrated dynamic fabrication system for injectable bone tissue engineering applications. 1) Dynamic seeding: add DBM Microcarriers ; 2) Dynamic seeding: add seed cells; 3) Dynamic expansion: cell proliferation on microcarriers ; 4) Osteogenic differentiation: change into osteoinduce medium ; 5) Osteogenic differentiated micro-TEBG ; 6) Alginate + micro TEBG: injectable therapy application.
